# Supplementary material
Source: Springer Nature journal article supplement (https://www.springermedizin.de/resource/supplementary/12889_2013_5738_MOESM11_ESM.pdf/9496094)

**Predicted Probability**

0.12  
0.10  
0.08  
0.06  
0.04  
0.02  
0.00  
-0.02  
-0.04

Gender

Relative

Migration

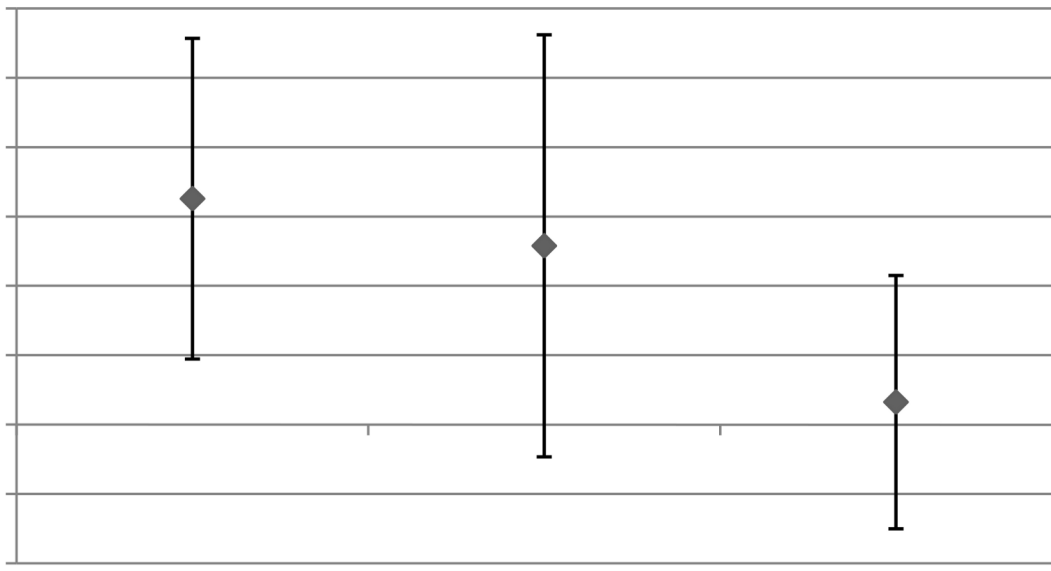

Supplement: MOESM11 [file 9496094]
